# Supplementary material
Source: Elsevier journal article supplement (https://rcastoragev2.blob.core.windows.net/53605934a106a1b02c5637c49c93247c/mmc1.pdf)
Supplement: mmc1 [file mmc1.pdf]

Supplementary table S1: Prevalence of erosive disease in carpometacarpal joints (1<sup>st</sup> CMCJ) in populations aged > 50 years with radiographic thumb base OA and concordant thumb base pain with radiographic thumb base OA, stratified for age categories and sex

| <b>Prevalence erosive disease in thumb base in ♂</b>                      | <b>All ages</b>          | <b>50-59 yrs</b>        | <b>60-69 yrs</b>        | <b>70-79 yrs</b>         | <b>≥80 yrs</b>          |
|---------------------------------------------------------------------------|--------------------------|-------------------------|-------------------------|--------------------------|-------------------------|
| Population with radiographic thumb base OA                                | 10/207<br>4.8 (2.3, 8.7) | 0/31<br>-               | 2/93<br>2.1 (0.2, 7.6)  | 8/70<br>11.4 (5.1, 21.3) | 0/13<br>-               |
| Population with concordant thumb base pain and radiographic thumb base OA | 7/102<br>6.9 (2.8, 13.6) | 0/15<br>-               | 2/44<br>4.6 (0.6, 15.5) | 5/35<br>14.3 (4.8, 30.3) | 0/8<br>-                |
| <b>Prevalence erosive disease in thumb base in ♀</b>                      | <b>All ages</b>          | <b>50-59 yrs</b>        | <b>60-69 yrs</b>        | <b>70-79 yrs</b>         | <b>≥80 yrs</b>          |
| Population with radiographic thumb base OA                                | 14/378<br>3.7 (2.0, 6.1) | 2/87<br>2.3 (0.3, 8.1)  | 6/146<br>4.1 (1.5, 8.7) | 5/123<br>4.1 (1.3, 9.2)  | 1/22<br>4.6 (0.1, 22.8) |
| Population with concordant thumb base pain and radiographic thumb base OA | 12/228<br>5.2 (3.1, 9.5) | 2/53<br>3.8 (0.5, 13.0) | 5/93<br>5.4 (1.8, 12.1) | 5/71<br>7.0 (2.3, 15.7)  | 0/11<br>-               |

Numbers are absolute numbers with percentages and 95% confidence intervals, no prevalence calculated as erosive disease was not present in the stratified group

Population with radiographic thumb base OA = at least one joint 1<sup>st</sup> carpometacarpal joint (1<sup>st</sup> CMCJ) or scaphotrapezoid joint (STJ) with Kellgren-Lawrence (KL) grade ≥2

Population with concordant thumb base pain and radiographic thumb base OA = pain in left of right thumb base combined with having 1<sup>st</sup> CMCJ or STJ with KL grade ≥2 in the painful joint
